# Supplementary material
Source: publisher figshare collection journal article supplement (https://karger.figshare.com/ndownloader/files/22643477)
Supplement: Supplementary file 1 [file 22643477]

**QUESTIONNAIRE 1: TECHNICAL ASPECTS**

1. Is it stated that cervical cancer is related to human papilloma virus and pap smear test is performed for early diagnosis of this cancer?
2. Is it stated that it is a painless procedure and does not require anesthesia?
3. Is it stated that a swab sample was taken from the cervix with a brush and this sample was sent for pathological examination?
4. Is it stated that there may be bleeding and similar complications?
5. Is it stated that she should not have had sexual intercourse for at least two days before the pap smear test?
6. Is it stated that she should not have washed the vagina for at least two days before the pap smear test?
7. Is it stated that she should not have applied vaginal treatment for at least two days before the pap smear test?
8. Is it stated that pap smear test was not performed during menstrual period?
9. Is it stated that the ideal time is 10 days after the end of the menstrual period until the next menstrual period?
10. Is it stated that pregnant women can have pap smear test?
11. Is it stated that this is only a screening test and may require colposcopy and biopsy for further examination?

**QUESTIONNAIRE 2: FOLLOW-UP PROTOCOL**

1. Is it stated that the onset of pap smear test is after 21 years of age or 3 years after being sexually active?
2. Is it stated that pap smear test screening intervals are sufficient every 3 years in the 21-29 age range?
3. Is it stated that if the pap smear test is performed alone between 30-65 years it is sufficient every 3 years?
4. Is it stated that if the Pap smear test and the HPV test are performed together between the ages of 30-65, is it sufficient to screen every 5 years?
5. Is it stated that if there is no problem with previous pap smear tests of people older than 65 years, screening tests can be terminated after this age?
6. Is it stated that people who have been vaccinated with HPV should follow the same follow-up protocol as unvaccinated people?
7. Is it stated that screening tests should be carried out annually in some special cases (including cervical cancer history, maternal exposure to DES, immunosuppressive treatment, HIV-positivity) ?
8. Is it stated that it is necessary to continue smear testing even after hysterectomy?
9. Is it stated that if there are risk factors, pap smear test should be continued after hysterectomy?

**QUESTIONNAIRE 3**

**THE ASSESSORS EVALUATED THE VİDEOS ACCORDİNG TO THE GUİDELİNES FOR THE PREPARATİON AND EVALUATİON OF VİDEO CAREER MEDİA BY THE AMERİCAN NATİONAL CAREER DEVELOPMENT ASSOCİATİON**

1. Was the aim of video clearly stated and was it explained in the first quarter of the video?
2. Did the title or name of the video match the aim of the video?
3. Were the design and the content of the video suitable for a targeted educational aim?
4. Were the skills and the technique of the procedure explained using a standard, comparable and “step by step” method?
5. Was the information given in the video useful for viewers to develop/enhance their skill base?
6. Was the content of the video appropriate for the health and safety of both the patient and the practitioner?
7. Was the quality of picture regarding colors and clarity acceptable?
8. Was the quality of video sound acceptable? (No sound should be scored as zero)
9. Was the length of the video in balance with the content of the video?
10. Was the information on the date of production or release, producers and the references clearly explained?
11. Were objectives, learning tasks and terminology clearly stated in the video enabling viewers to address those tasks?
12. Did the video have stop-and-discuss points, additional aids such as scripts and/or summarized information on procedure?
13. Was any information given on a way to evaluate the effectiveness and reproducibility of the video?
14. Did the content of the video stimulate viewers to make the transition from passive viewer to active practitioner in the application of the technique?
